# Supplementary material
Source: PubMed Central journal article supplement (PMC8173779)
Supplement: mmc1.pdf [file mmc1.pdf]

# Renin-Angiotensin-Aldosterone System Inhibitor Use and Mortality in Pulmonary Hypertension

Insights From the Veterans Affairs Clinical Assessment  
Reporting and Tracking Database

*Tim Lahm, MD; Edward Hess, MS; Anna E. Barón, PhD; Thomas M. Maddox, MD;  
Mary E. Plomondon, PhD; Gaurav Choudhary, MD; Bradley A. Maron, MD;  
Roham T. Zamanian, MD; and Peter J. Leary, MD, PhD*

CHEST 2021; 159(4):1586-1597

*Online supplements are not copyedited prior to posting and the author(s) take full responsibility for the accuracy of all data.*

© 2020 AMERICAN COLLEGE OF CHEST PHYSICIANS. Reproduction of this article is prohibited without written permission from the American College of Chest Physicians. See online for more details. DOI: 10.1016/j.chest.2020.09.258

## e-Appendix 1.

### Supplemental Methods

#### Participants

The CART cohort is a large, national data collection of veterans who received a heart catheterization at a VA medical center since 2005. For the current analysis, we included all veterans who received a right heart catheterization (RHC) between fiscal year 2008 and 2016, had a mean pulmonary artery pressure (mPAP) of  $\geq 25$  mmHg (which defined PH during the study period), and a recorded value for pulmonary artery wedge pressure (PAWP). Since the majority of patients in this cohort exhibit non-PAH PH<sup>1</sup>, CART represents a unique opportunity to study the effect of RAAS inhibitors on clinical outcomes in these clinically highly common and highly relevant types of PH. We have previously leveraged this database to study hemodynamic phenotypes, gender differences and pharmaco-epidemiology in the VA system<sup>1-4</sup>. The CART program has been described in detail<sup>1,5,6</sup>. The CART cohort has been validated for clinical accuracy and uses embedded software in the integrated VA health care system to collect patient data, procedural characteristics, and longitudinal outcomes to assemble the cohort. Rigorous quality control procedures are in place. Pulmonary vascular resistance (PVR) was calculated as  $(mPAP - PAWP)/\text{cardiac output}$  for each participant and then averaged. Mean arterial pressure was determined non-invasively at the time of RHC. The Colorado Multiple Institution Review Board approved this study (#14-1449).

#### Medication use

Medication use was ascertained using the VA medical record. Participants were considered to have “used” a medication if an *outpatient* prescription was filled within 90 days of their RHC. Participants were excluded if they died within 90 days of their RHC or had a hospital stay lasting longer than 60 days following that catheterization. This provided a minimum of 30 days to detect outpatient medication use.

RAAS inhibitor (ACEI/ARB or AA) use was the primary exposure in all analyses. Other baseline medications were considered as potential confounders and included filled prescriptions for beta-receptor antagonists, calcium-channel blockers, digoxin, diuretics, lipid lowering medications, medications for asthma or

chronic obstructive pulmonary disease, medications for diabetes mellitus, oral anticoagulants, platelet inhibitors, systemic vasodilators (including nitrates, alpha<sub>1</sub>-antagonists, alpha<sub>2</sub>-agonists, and direct vasodilators), H<sub>2</sub> receptor antagonists, and proton-pump inhibitors. A full medication list is included in **e-Table 1**.

### Covariates

In addition to concurrent medications, characteristics that might confound the relationship between RAAS inhibitors and mortality were collected from the VA electronic medical record. Specifically, we accounted for the following possible confounders: (1) demographic characteristics (age [modeled continuously], sex, race/ethnicity [black or African American, white, or other], and body mass index [modeled as a natural spline with fixed degrees of freedom]); (2) markers of socioeconomic status and health behaviors (current or previous history of smoking, current or previous history of alcohol abuse, quartiles of income [based on the median income of a participants home zip code according to 2006-2010 census data], and marital status); (3) comorbid medical conditions at the time the criterion for PH was met (the presence or absence of end-stage renal disease, diabetes, cirrhosis, sleep apnea, chronic obstructive pulmonary disease [COPD], asthma, interstitial lung disease, prior myocardial infarction, prior coronary intervention, congestive heart failure [CHF], valvular disease, congenital heart disease, and atrial fibrillation or flutter); and (4) co-medication use (as described in **e-Table 1**). To avoid confounding by co-medication use with another RAAS inhibitor in patients taking both AAs and ACEI/ARBs, we included the medication class not being estimated in the adjustment (e.g., if AA was the exposure of interest, we included ACEI/ARBs in the adjustment and *vice versa*).

In additional analyses for the AA user cohort, potassium levels were included as a covariate in addition to the original predictors (sex, race, age, BMI, income, tobacco, alcohol abuse and marital status). Potassium level was modeled continuously as a natural spline with 3 degrees of freedom. Levels up to 60 days prior to the procedure date were included. To explore whether disease severity is a potential modifiers of the AA-mortality relationship, we performed sensitivity analyses in adjusted models with B-type natriuretic peptide (BNP) levels and inpatient status at the time of RHC (as indicators of disease severity) included as covariates in addition to the original predictors. BNP levels up to 60 days prior to the procedure date were included.

## Outcomes

The primary outcome was the rate of all-cause mortality. Risk time accrued after the 90-day window used to establish exposure status. Separation of exposure ascertainment and outcome assessment was used to avoid immortal time bias and ensure all participants had an equal chance for exposure to RAAS inhibitors. Mortality was determined using the combined VA vital status file, which has a 97.6% exact agreement with the National Death Index<sup>7</sup>. Because this was an observational cohort of real-world clinical care, no participant was considered “lost to follow-up” as there was no fixed study determined interval at which we expected a visit and could censor them if this visit was missing. If a participant died, then their risk time stopped accruing at the time of death. All other participants were considered to be alive and accrued risk-time until the date of data extraction.

## Statistical analysis

We used methods of Kaplan & Meier to estimate unadjusted associations and Cox proportional hazards using a complete case analysis to estimate adjusted associations of RAAS inhibitor use within 90 days of RHC and mortality. Log-rank testing (distributed as a Chi-square) was used to determine Kaplan-Meier survival estimators. A series of planned *a priori* adjustments were performed and consistent with our previous manuscripts<sup>4</sup>. In the limited model, we adjusted for age, sex, race, and body mass index. In the adjusted model, we also accounted for participants’ markers of socioeconomic status and health behaviors including income, tobacco use, alcohol abuse, and marital status. In separate models, we further adjusted for comorbid medical conditions or co-medication use. A random intercept (frailty term) was included to account for differences between hospitals in all primary models. Variable selection for the Cox models was justified scientifically for parameters of interest. Given the size of this cohort, there was not a statistical approach to model specification and all covariates we chosen *a priori*.

Analyses were repeated in a cohort of propensity-matched participants. Propensity scores were used to match RAAS inhibitor users with non-users that had an otherwise similar propensity to use RAAS inhibitors using the MatchIt package in R<sup>8,9</sup>. The propensity to use RAAS inhibitors was calculated as a logit function including

factors hypothesized to predict RAAS inhibitor use, such as comorbidity, body mass index, and co-medication use. Nearest-neighbor matching was used to create pairs of RAAS inhibitor users and non-users who had an otherwise similar likelihood of use. Only RAAS inhibitor users with a propensity score less extreme than non-users were matched (common support). Matched pairs were included only if propensity scores differed by less than 0.05 standard deviations to ensure similarity.

Because this was a large administrative cohort, careful phenotyping by World Health Organization PH group was not feasible; however, the PAWP was available for all participants. In pre-specified exploratory analyses, PAWP less than or equal to 15 mmHg versus greater than 15 mmHg was evaluated as an effect modifier in the association between RAAS inhibitor use and mortality in veterans with PH.

Given the unexpected finding suggesting worse mortality in unadjusted relationships with AA users relative to non-users and the absence of this relationship in the propensity-matched cohort, we considered additional exploratory adjustments to better understand the potential role of confounding in this relationship. In particular, we explored whether further adjustment by blood potassium level or markers of disease severity modified the relationship between AA use and mortality. B-type natriuretic peptide (BNP) level and inpatient status at the time of RHC were used as markers of disease severity.

Analyses were performed using SAS 9.4 and R 3.3.1.  $p < 0.05$  was considered statistically significant.

## References

1. Maron BA, Hess E, Maddox TM, et al. Association of Borderline Pulmonary Hypertension With Mortality and Hospitalization in a Large Patient Cohort: Insights From the Veterans Affairs Clinical Assessment, Reporting, and Tracking Program. *Circulation*. 2016;133(13):1240-1248.
2. Opotowsky AR, Hess E, Maron BA, et al. Thermodilution vs Estimated Fick Cardiac Output Measurement in Clinical Practice: An Analysis of Mortality From the Veterans Affairs Clinical Assessment, Reporting, and Tracking (VA CART) Program and Vanderbilt University. *JAMA Cardiol*. 2017;2(10):1090-1099.
3. Ventetuolo CE, Hess E, Austin ED, et al. Sex-based differences in veterans with pulmonary hypertension: Results from the veterans affairs-clinical assessment reporting and tracking database. *PLoS One*. 2017;12(11):e0187734.
4. Leary PJ, Hess E, Baron AE, et al. H2-receptor Antagonist Use and Mortality in Pulmonary Hypertension: Insight from the VA-CART Program. *Am J Resp Crit Care Med*. 2018;197:1638-1641.
5. Maddox TM, Plomondon ME, Petrich M, et al. A national clinical quality program for Veterans Affairs catheterization laboratories (from the Veterans Affairs clinical assessment, reporting, and tracking program). *Am J Cardiol*. 2014;114(11):1750-1757.
6. Box TL, McDonnell M, Helfrich CD, Jesse RL, Fihn SD, Rumsfeld JS. Strategies from a nationwide health information technology implementation: the VA CART story. *J Gen Intern Med*. 2010;25 Suppl 1:72-76.
7. Sohn MW, Arnold N, Maynard C, Hynes DM. Accuracy and completeness of mortality data in the Department of Veterans Affairs. *Popul Health Metr*. 2006;4:2.
8. Ho DE IK, King G, Stuart EA. Matching as Nonparametric Preprocessing for Reducing Model Dependence in Parametric Causal Inference. *Political Analysis*. 2007(15):199-236.
9. Ho DE IK, King G, Stuart EA. MatchIt: Nonparametric Preprocessing for Parametric Causal Inference. *J Stat Softw*. 2011(42):1–28.

## Supplemental tables

**e-Table 1: List of medications used for analyses.** ACE inhibitors, angiotensin receptor blockers and aldosterone antagonists were primary exposures of interest and are shown in gray fields; all other medications were considered as potential confounders.

|                                                                                                                                                                                                                                                                                                                                                        |                                                                                                                                                                                            |                                                                                                                                                                                                                                              |                                                                                                                                                   |                                                                                                                                                                                                                                                                         |
|--------------------------------------------------------------------------------------------------------------------------------------------------------------------------------------------------------------------------------------------------------------------------------------------------------------------------------------------------------|--------------------------------------------------------------------------------------------------------------------------------------------------------------------------------------------|----------------------------------------------------------------------------------------------------------------------------------------------------------------------------------------------------------------------------------------------|---------------------------------------------------------------------------------------------------------------------------------------------------|-------------------------------------------------------------------------------------------------------------------------------------------------------------------------------------------------------------------------------------------------------------------------|
| <b>ACE-inhibitors</b><br>Benazepril<br>Captopril<br>Enalapril<br>Fosinopril<br>Lisinopril<br>Moexipril<br>Perindopril<br>Quinapril<br>Ramipril<br>Trandolapril<br>Cilazapril<br>Zofenopril<br>Temocapril<br>Renormax                                                                                                                                   | <b>Angiotensin receptor blockers</b><br>Azilsartan<br>Candesartan<br>Eprosartan<br>Irbesartan<br>Losartan<br>Olmesartan<br>Telmisartan<br>Valsartan                                        | <b>Aldosterone antagonists</b><br>Spironolactone<br>Eplerenone                                                                                                                                                                               | <b>Anticoagulants</b><br>Enoxaparin<br>Fondaparinux<br>Warfarin<br>Apixaban<br>Dabigatran<br>Edoxaban<br>Rivaroxaban<br>Idraparinux<br>Tinzaparin | <b>Beta-blockers</b><br>Acebutolol<br>Atenolol<br>Betaxolol<br>Bisoprolol<br>Carteolol<br>Carvedilol<br>Inderal<br>Labetalol<br>Metoprolol<br>Nadolol<br>Nebivolol<br>Penbutolol<br>Pindolol<br>Propranolol<br>Sotalol<br>Timolol                                       |
| <b>Bronchodilators/<br/>inhaled<br/>corticosteroids</b><br>Albuterol<br>Formoterol<br>Levalbuterol<br>Salmeterol<br>Terbutaline<br>Theophylline<br>Ipratropium<br>Tiotropium<br>Beclomethasone<br>Budesonide<br>Fluticasone<br>Triamcinolone<br>Montelukast<br>Zafirlukast<br>Bitolterol<br>Beta-sitosterol<br>Pirbuterol<br>Roflumilast<br>Cilomilast | <b>Calcium channel blockers</b><br>Amlodipine<br>Clevidipine<br>Diltiazem<br>Felodipine<br>Mibefradil<br>Nicardipine<br>Nifedipine<br>Nimodipine<br>Nisoldipine<br>Verapamil<br>Lacidipine | <b>Corticosteroids</b><br>Celestone<br>Cortisone<br>Dexamethasone<br>Hydrocortisone<br>Kenacortisone<br>Methylprednisolone<br>Prednisone<br>Prednisone/deltazone<br>Benesone<br>(betamethasone)<br>Fluticasone<br>Lotrisone                  | <b>Digitalis</b><br>Digitoxin<br>Digoxin                                                                                                          | <b>Diuretics</b><br>Amiloride<br>Benzthiazide<br>Bumetanide<br>Chlorothiazide<br>Chlorthalidone<br>Ethacrynic Acid<br>(Ethacrynate)<br>Furosemide<br>Hydrochlorothiazide<br>Indapamide<br>Metolazone<br>Torsemide<br>Triamterene<br>Trichlormethiazide<br>Cyclothiazide |
| <b>Glucose-lowering agents</b><br>Acarbose<br>Exenatide<br>Glipizide<br>Glimepiride<br>Glyburide<br>Insulin Glargine<br>Regular Insulin<br>Insulin Lispro<br>NPH insulin<br>Metaglipin<br>Metformin<br>Nateglinide<br>Pioglitazone<br>Pramlintide                                                                                                      | <b>H2 Blockers</b><br>Cimetidine<br>Famotidine<br>Nizatidine<br>Ranitidine<br>Roxatidine                                                                                                   | <b>Lipid-lowering agents</b><br>Clofibrate<br>Fenofibrate<br>Gemfibrozil<br>Atorvastatin<br>Cerivastatin<br>Cholestyramine<br>Ezetimibe<br>Fluvastatin<br>Lovastatin<br>Niacin<br>Pravastatin<br>Rosuvastatin<br>Simvastatin<br>Pitavastatin | <b>Platelet inhibitors</b><br>Clopidogrel<br>Prasugrel<br>Dipyridamole<br>Ticlopidine                                                             | <b>Proton pump inhibitors</b><br>Esomeprazole<br>Lansoprazole<br>Omeprazole<br>Pantoprazole<br>Dexlansoprazole<br>Rabeprazole                                                                                                                                           |

Repaglinide  
Rosiglitazone  
Sitagliptan  
Tolazamide  
Tolbutamide  
Troglitazone  
Hoe901  
Humulin  
Novolin

**Pulmonary  
vasodilators**

Sildenafil (45+ tablets  
monthly)  
Tadalafil (30+ tablets  
monthly)  
Bosentan  
Ambristentan  
Macitentan  
Treprostinil  
Epoprostenol (IV only)  
Iloprost  
Selexipag  
Riociguat

**Systemic vasodilators**

*Alpha-blockers*  
Doxazosin  
Phenoxybenzamine  
Prazosin  
Terazosin  
*Nitrates*  
Isosorbide dinitrate  
Isosorbide mononitrate  
Isotrater  
Nitroglycerin  
*Alpha-Agonists*  
Clonidine  
Apraclonidine  
Guanfacine  
Methyldopa  
Reserpine  
*Direct vasodilators*  
Hydralazine  
Minoxidil



**e-Table 2: Medication use of the study cohort.** Values are expressed in percent, with absolute numbers included in parentheses.

| <b>Medication class</b>               | <b>All subjects<br/>(N = 24,221)</b> | <b>ACEI/ARB<br/>users<br/>(N = 14,912)</b> | <b>ACEI/ARB<br/>non-users<br/>(N = 9,309)</b> | <b>AA<br/>users<br/>(N = 4,092)</b> | <b>AA<br/>non-users<br/>(N = 20,129)</b> |
|---------------------------------------|--------------------------------------|--------------------------------------------|-----------------------------------------------|-------------------------------------|------------------------------------------|
| ACE inhibitor                         | 49.0 (11875)                         | 79.6 (11875)                               | 0.0 (0)                                       | 58.2 (2382)                         | 47.2 (9493)                              |
| Aldosterone antagonist                | 16.9 (4092)                          | 20.5 (3059)                                | 11.1 (1033)                                   | 100.0 (4092)                        | 0.0 (0)                                  |
| Alpha agonist                         | 1.5 (360)                            | 1.7 (254)                                  | 1.1 (106)                                     | 1.4 (56)                            | 1.5 (304)                                |
| Angiotensin receptor blocker          | 13.8 (3334)                          | 22.4 (3334)                                | 0.0 (0)                                       | 18.8 (771)                          | 12.7 (2563)                              |
| Anticoagulant                         | 32.7 (7920)                          | 34.6 (5165)                                | 29.6 (2755)                                   | 38.9 (1591)                         | 31.4 (6329)                              |
| Antiplatelet therapy                  | 19.1 (4620)                          | 21.8 (3247)                                | 14.7 (1373)                                   | 18.3 (749)                          | 19.2 (3871)                              |
| Beta blocker                          | 73.4 (17788)                         | 82.7 (12326)                               | 58.7 (5462)                                   | 85.8 (3510)                         | 70.9 (14278)                             |
| Bronchodilator/inhaled corticosteroid | 39.3 (9516)                          | 39.5 (5889)                                | 39.0 (3627)                                   | 39.7 (1625)                         | 39.2 (7891)                              |
| Calcium channel blocker               | 22.6 (5475)                          | 23.4 (3483)                                | 21.4 (1992)                                   | 14.4 (591)                          | 24.3 (4884)                              |
| Digitalis                             | 12.0 (2907)                          | 14.0 (2093)                                | 8.7 (814)                                     | 25.5 (1044)                         | 9.3 (1863)                               |
| Diuretic                              | 71.7 (17367)                         | 79.3 (11830)                               | 59.5 (5537)                                   | 90.3 (3695)                         | 67.9 (13672)                             |
| Glucose-lowering agent                | 37.7 (9141)                          | 42.9 (6395)                                | 29.5 (2746)                                   | 41.4 (1696)                         | 37.0 (7445)                              |
| H2 blocker                            | 8.2 (1981)                           | 8.7 (1294)                                 | 7.4 (687)                                     | 8.2 (336)                           | 8.2 (1645)                               |
| Hydrochlorothiazide                   | 7.4 (1799)                           | 8.5 (1272)                                 | 5.7 (527)                                     | 2.7 (111)                           | 8.4 (1688)                               |
| Lipid-lowering agent                  | 67.7 (16407)                         | 75.6 (11273)                               | 55.2 (5134)                                   | 70.6 (2889)                         | 67.2 (13518)                             |
| Nitrate                               | 23.5 (5688)                          | 26.1 (3896)                                | 19.3 (1792)                                   | 27.6 (1130)                         | 22.6 (4558)                              |
| Proton pump inhibitor                 | 38.5 (9322)                          | 39.9 (5950)                                | 36.2 (3372)                                   | 41.8 (1711)                         | 37.8 (7611)                              |
| Pulmonary vasodilator                 | 4.0 (961)                            | 2.7 (403)                                  | 6.0 (558)                                     | 4.3 (175)                           | 3.9 (786)                                |
| Systemic vasodilator                  | 10.4 (2531)                          | 10.3 (1529)                                | 10.8 (1002)                                   | 14.2 (583)                          | 9.7 (1948)                               |

**e-Table 3: Matched cohort for the ACEI/ARB analyses (stratified by ACEI/ARB exposure).** Values are expressed in percent, with absolute numbers included in parentheses (with the exception of age, body mass index and income, which are expressed as means with standard deviation). CABG = coronary artery bypass grafting, CHD = congenital heart disease, CHF = congestive heart failure, CKD = chronic kidney disease, COPD = chronic obstructive pulmonary disease, ILD = interstitial lung disease, MI = myocardial infarction, OSA = obstructive sleep apnea, PCI = percutaneous coronary intervention; RAP = right atrial pressure, mPAP = mean pulmonary arterial pressure, PAWP = pulmonary artery wedge pressure, CI = cardiac index, PVR = pulmonary vascular resistance, MAP = mean arterial pressure.

| Variable                                | All subjects<br>(N = 14,960) | ACEI/ARB users<br>(N = 7,480) | ACEI/ARB non-<br>users<br>(N = 7,480) | p-value |
|-----------------------------------------|------------------------------|-------------------------------|---------------------------------------|---------|
| <b>Age</b>                              | 67.4 (9.9)                   | 67.2 (9.9)                    | 67.5 (10.0)                           | 0.13    |
| <b>Sex (male)</b>                       | 96.3 (14401)                 | 96.2 (7196)                   | 96.3 (7205)                           | 0.7     |
| <b>Race</b>                             |                              |                               |                                       | 0.61    |
| • White                                 | 78.0 (11666)                 | 77.7 (5809)                   | 78.3 (5857)                           |         |
| • Black                                 | 20.0 (2993)                  | 20.3 (1516)                   | 19.7 (1477)                           |         |
| • Other                                 | 2.0 (301)                    | 2.1 (155)                     | 2.0 (146)                             |         |
| <b>Body mass index</b>                  | 31.4 (6.9)                   | 31.5 (6.9)                    | 31.3 (6.9)                            | 0.12    |
| <b>Socioeconomic status</b>             |                              |                               |                                       |         |
| • Tobacco use                           | 62.2 (9311)                  | 62.5 (4677)                   | 62.0 (4634)                           | 0.47    |
| • Alcohol abuse                         | 10.7 (1602)                  | 10.5 (788)                    | 10.9 (814)                            | 0.49    |
| • Income                                | 50015 (17349)                | 49858<br>(17043)              | 50172<br>(17650)                      | 0.27    |
| <b>Marital status</b>                   |                              |                               |                                       | 0.84    |
| • Married                               | 50.2 (7507)                  | 49.8 (3727)                   | 50.5 (3780)                           |         |
| • Divorced                              | 29.1 (4349)                  | 29.2 (2186)                   | 28.9 (2163)                           |         |
| • Single                                | 12.7 (1904)                  | 12.9 (964)                    | 12.6 (940)                            |         |
| • Widowed                               | 8.0 (1200)                   | 8.1 (603)                     | 8.0 (597)                             |         |
| <b>Comorbidities</b>                    |                              |                               |                                       |         |
| • Asthma                                | 5.6 (834)                    | 5.7 (423)                     | 5.5 (411)                             | 0.67    |
| • Atrial fibrillation/flutter           | 35.2 (5272)                  | 35.2 (2635)                   | 35.3 (2637)                           | 0.97    |
| • CHD                                   | 0.6 (88)                     | 0.5 (40)                      | 0.6 (48)                              | 0.39    |
| • CHF                                   | 65.6 (9807)                  | 65.8 (4920)                   | 65.3 (4887)                           | 0.57    |
| • Cirrhosis                             | 7.9 (1176)                   | 7.7 (577)                     | 8.0 (599)                             | 0.5     |
| • CKD/Dialysis                          | 37.9 (5666)                  | 37.9 (2837)                   | 37.8 (2829)                           | 0.89    |
| • COPD                                  | 39.8 (5955)                  | 39.5 (2952)                   | 40.1 (3003)                           | 0.39    |
| • Diabetes                              | 50.6 (7573)                  | 51.1 (3824)                   | 50.1 (3749)                           | 0.22    |
| • Hypertension                          | 90.8 (13585)                 | 93.6 (7001)                   | 88.0 (6584)                           | <.001   |
| • ILD                                   | 0.8 (117)                    | 0.7 (55)                      | 0.8 (62)                              | 0.52    |
| • OSA                                   | 15.7 (2342)                  | 15.7 (1174)                   | 15.6 (1168)                           | 0.89    |
| • Prior MI, PCI or CABG                 | 41.4 (6189)                  | 41.4 (3093)                   | 41.4 (3096)                           | 0.96    |
| • Valvular heart disease                | 42.1 (6299)                  | 41.8 (3128)                   | 42.4 (3171)                           | 0.48    |
| <b>Medications</b>                      |                              |                               |                                       |         |
| • ACE inhibitor                         | 39.9 (5968)                  | 79.8 (5968)                   | 0.0 (0)                               | <.001   |
| • Aldosterone antagonist                | 13.2 (1975)                  | 13.5 (1008)                   | 12.9 (967)                            | 0.32    |
| • Alpha agonist                         | 1.4 (208)                    | 1.5 (113)                     | 1.3 (95)                              | 0.21    |
| • Angiotensin receptor blocker          | 10.9 (1638)                  | 21.9 (1638)                   | 0.0 (0)                               | <.001   |
| • Anticoagulant                         | 33.1 (4950)                  | 33.1 (2478)                   | 33.0 (2472)                           | 0.92    |
| • Antiplatelet therapy                  | 17.4 (2597)                  | 17.6 (1313)                   | 17.2 (1284)                           | 0.53    |
| • Beta blocker                          | 70.4 (10536)                 | 70.9 (5301)                   | 70.0 (5235)                           | 0.24    |
| • Bronchodilator/inhaled corticosteroid | 39.9 (5962)                  | 39.7 (2966)                   | 40.1 (2996)                           | 0.62    |
| • Calcium channel blocker               | 23.6 (3533)                  | 23.8 (1780)                   | 23.4 (1753)                           | 0.6     |
| • Digitalis                             | 10.2 (1532)                  | 10.4 (775)                    | 10.1 (757)                            | 0.63    |
| • Diuretic                              | 68.7 (10276)                 | 69.1 (5170)                   | 68.3 (5106)                           | 0.26    |
| • Glucose-lowering agent                | 34.8 (5209)                  | 35.4 (2650)                   | 34.2 (2559)                           | 0.12    |
| • H2 blocker                            | 8.1 (1217)                   | 8.3 (618)                     | 8.0 (599)                             | 0.57    |
| • Hydrochlorothiazide                   | 6.8 (1024)                   | 7.0 (523)                     | 6.7 (501)                             | 0.48    |
| • Lipid-lowering agent                  | 64.7 (9683)                  | 64.9 (4854)                   | 64.6 (4829)                           | 0.67    |
| • Nitrate                               | 23.0 (3434)                  | 23.4 (1750)                   | 22.5 (1684)                           | 0.2     |
| • Proton pump inhibitor                 | 39.0 (5827)                  | 38.7 (2895)                   | 39.2 (2932)                           | 0.54    |
| • Pulmonary vasodilator                 | 4.2 (631)                    | 4.2 (316)                     | 4.2 (315)                             | 0.97    |
| • Systemic vasodilator                  | 12.0 (1789)                  | 12.0 (894)                    | 12.0 (895)                            | 0.98    |

Online supplements are not copyedited prior to posting and the author(s) take full responsibility for the accuracy of all data.

# CHEST™ Online Supplement

## Hemodynamics

|                              |             |             |            |       |
|------------------------------|-------------|-------------|------------|-------|
| • RAP (mmHg)                 | 12.0 (5.7)  | 12.0 (5.6)  | 12.1 (5.8) | 0.12  |
| • mPAP (mmHg)                | 35.1 (8.5)  | 35.0 (8.5)  | 35.1 (8.6) | 0.44  |
| • PAWP (mmHg)                | 21.2 (7.4)  | 21.4 (7.3)  | 21.0 (7.4) | <.001 |
| • CI (L/min/m <sup>2</sup> ) | 2.5 (0.7)   | 2.4 (0.7)   | 2.5 (0.7)  | <.001 |
| • PVR (Wood units)           | 2.9 (2.1)   | 2.9 (2.0)   | 3.0 (2.1)  | 0.04  |
| • MAP (mmHg)                 | 93.0 (10.1) | 93.7 (10.3) | 92.3 (9.8) | <.001 |

**e-Table 4: Matched cohort for the AA analyses (stratified by AA exposure).** Values are expressed in percent, with absolute numbers included in parentheses (with the exception of age, body mass index and income, which are expressed as means with standard deviation). CABG = coronary artery bypass grafting, CHD = congenital heart disease, CHF = congestive heart failure, CKD = chronic kidney disease, COPD = chronic obstructive pulmonary disease, ILD = interstitial lung disease, MI = myocardial infarction, OSA = obstructive sleep apnea, PCI = percutaneous coronary intervention; RAP = right atrial pressure, mPAP = mean pulmonary arterial pressure, PAWP = pulmonary artery wedge pressure, CI = cardiac index, PVR = pulmonary vascular resistance, MAP = mean arterial pressure.

| Variable                                | All subjects<br>(N = 7,872) | AA users<br>(N = 3,936) | AA non-users<br>(N = 3,936) | p-value |
|-----------------------------------------|-----------------------------|-------------------------|-----------------------------|---------|
| <b>Age</b>                              | 64.3 (9.4)                  | 64.3 (9.5)              | 64.3 (9.4)                  | 0.93    |
| <b>Sex (male)</b>                       | 97.0 (7636)                 | 97.1 (3821)             | 96.9 (3815)                 | 0.69    |
| <b>Race</b>                             |                             |                         |                             | 0.84    |
| • White                                 | 71.4 (5622)                 | 71.6 (2819)             | 71.2 (2803)                 |         |
| • Black                                 | 26.7 (2098)                 | 26.4 (1039)             | 26.9 (1059)                 |         |
| • Other                                 | 1.9 (152)                   | 2.0 (78)                | 1.9 (74)                    |         |
| <b>Body mass index</b>                  | 31.7 (7.1)                  | 31.7 (7.1)              | 31.7 (7.1)                  | 0.83    |
| <b>Socioeconomic status</b>             |                             |                         |                             |         |
| • Tobacco use                           | 63.0 (4956)                 | 63.3 (2491)             | 62.6 (2465)                 | 0.54    |
| • Alcohol Abuse                         | 14.5 (1142)                 | 14.2 (558)              | 14.8 (584)                  | 0.41    |
| • Income                                | 49398 (17290)               | 49284 (16820)           | 49513 (17748)               | 0.56    |
| <b>Marital status</b>                   |                             |                         |                             | 0.62    |
| • Married                               | 47.3 (3723)                 | 46.9 (1845)             | 47.7 (1878)                 |         |
| • Divorced                              | 30.9 (2436)                 | 31.6 (1243)             | 30.3 (1193)                 |         |
| • Single                                | 15.5 (1224)                 | 15.3 (601)              | 15.8 (623)                  |         |
| • Widowed                               | 6.2 (489)                   | 6.3 (247)               | 6.1 (242)                   |         |
| <b>Comorbidities</b>                    |                             |                         |                             |         |
| • Asthma                                | 5.6 (439)                   | 5.5 (217)               | 5.6 (222)                   | 0.81    |
| • Atrial fibrillation/flutter           | 38.5 (3032)                 | 38.4 (1510)             | 38.7 (1522)                 | 0.78    |
| • CHD                                   | 0.4 (34)                    | 0.4 (17)                | 0.4 (17)                    | 1.00    |
| • CHF                                   | 90.3 (7110)                 | 90.2 (3549)             | 90.5 (3561)                 | 0.65    |
| • Cirrhosis                             | 11.9 (934)                  | 11.4 (448)              | 12.3 (486)                  | 0.19    |
| • CKD/Dialysis                          | 37.5 (2955)                 | 36.8 (1447)             | 38.3 (1508)                 | 0.16    |
| • COPD                                  | 38.4 (3019)                 | 38.4 (1510)             | 38.3 (1509)                 | 0.98    |
| • Diabetes                              | 55.9 (4401)                 | 55.5 (2183)             | 56.4 (2218)                 | 0.43    |
| • Hypertension                          | 91.1 (7174)                 | 91.1 (3586)             | 91.2 (3588)                 | 0.94    |
| • ILD                                   | 0.4 (33)                    | 0.4 (15)                | 0.5 (18)                    | 0.6     |
| • OSA                                   | 17.1 (1344)                 | 17.0 (671)              | 17.1 (673)                  | 0.95    |
| • Prior MI, PCI or CABG                 | 46.3 (3645)                 | 46.6 (1835)             | 46.0 (1810)                 | 0.57    |
| • Valvular heart disease                | 33.5 (2639)                 | 33.4 (1315)             | 33.6 (1324)                 | 0.83    |
| <b>Medications</b>                      |                             |                         |                             |         |
| • ACE inhibitor                         | 58.6 (4613)                 | 57.5 (2265)             | 59.7 (2348)                 | 0.06    |
| • Aldosterone antagonist                | 50.0 (3936)                 | 100.0 (3936)            | 0.0 (0)                     | <.001   |
| • Alpha agonist                         | 1.4 (111)                   | 1.4 (56)                | 1.4 (55)                    | 0.92    |
| • Angiotensin receptor antagonist       | 16.6 (1310)                 | 18.7 (736)              | 14.6 (574)                  | <.001   |
| • Anticoagulant                         | 38.7 (3044)                 | 38.4 (1512)             | 38.9 (1532)                 | 0.64    |
| • Antiplatelet therapy                  | 18.4 (1451)                 | 18.5 (730)              | 18.3 (721)                  | 0.79    |
| • Beta blocker                          | 85.5 (6728)                 | 85.4 (3360)             | 85.6 (3368)                 | 0.8     |
| • Bronchodilator/inhaled corticosteroid | 40.0 (3147)                 | 39.9 (1572)             | 40.0 (1575)                 | 0.95    |
| • Calcium channel blocker               | 15.5 (1223)                 | 14.9 (586)              | 16.2 (637)                  | 0.11    |
| • Digitalis                             | 23.0 (1809)                 | 23.1 (911)              | 22.8 (898)                  | 0.73    |
| • Diuretic                              | 89.9 (7078)                 | 89.9 (3539)             | 89.9 (3539)                 | 1.00    |
| • Glucose-lowering agent                | 42.3 (3331)                 | 41.7 (1643)             | 42.9 (1688)                 | 0.31    |
| • H2 blocker                            | 8.3 (657)                   | 8.4 (330)               | 8.3 (327)                   | 0.9     |
| • Hydrochlorothiazide                   | 2.7 (211)                   | 2.8 (111)               | 2.5 (100)                   | 0.44    |
| • Lipid-lowering agent                  | 70.7 (5564)                 | 71.0 (2793)             | 70.4 (2771)                 | 0.59    |
| • Nitrate                               | 28.0 (2204)                 | 27.7 (1091)             | 28.3 (1113)                 | 0.58    |
| • Proton pump inhibitor                 | 41.5 (3264)                 | 41.5 (1633)             | 41.4 (1631)                 | 0.96    |
| • Pulmonary vasodilator                 | 4.1 (324)                   | 4.2 (167)               | 4.0 (157)                   | 0.57    |
| • Systemic vasodilator                  | 14.2 (1119)                 | 14.1 (555)              | 14.3 (564)                  | 0.77    |
| <b>Hemodynamics</b>                     |                             |                         |                             |         |

# CHEST™ Online Supplement

|                              |             |             |             |       |
|------------------------------|-------------|-------------|-------------|-------|
| • RAP (mmHg)                 | 13.1 (6.0)  | 13.3 (6.2)  | 12.8 (5.9)  | <.001 |
| • mPAP (mmHg)                | 36.7 (8.7)  | 37.0 (8.7)  | 36.5 (8.7)  | 0.01  |
| • PAWP (mmHg)                | 23.1 (7.7)  | 23.6 (7.7)  | 22.6 (7.5)  | <.001 |
| • CI (L/min/m <sup>2</sup> ) | 2.3 (0.7)   | 2.2 (0.7)   | 2.4 (0.7)   | <.001 |
| • PVR (Wood units)           | 3.0 (2.1)   | 3.1 (2.1)   | 3.0 (2.1)   | 0.21  |
| • MAP (mmHg)                 | 92.4 (11.0) | 91.5 (11.2) | 93.3 (10.7) | <.001 |

**e-Table 5: Interactions between PAWP and ACEI/ARB exposure or AA exposure.** Summarized in the table are the hazard ratios (95% CI) for the interaction term of ACEI/ARB exposure (upper panel) or AA exposure (lower panel) by PAWP category for the assessed models. The PAWP category has a cut-point of 15 mmHg as indicated in the table. For this aim, model 1 (limited adjustment) and model 3 (full adjustment with com-morbidities as co-variates) were included. The same analyses were run using the ACEI/ARB or AA propensity matched cohort. P-values >0.05 indicate that PAWP is not an effect modifier of the relationships between RAAS inhibitor use and mortality. Results are presented with and without adjustment in the full cohort and the smaller cohort of participants who used RAAS inhibitors compared to participants with an otherwise similar propensity to use RAAS inhibitors who did not use these medications.

| ACEI/ARB                                 | Full Cohort      |                         | Propensity-matched Cohort |                         |
|------------------------------------------|------------------|-------------------------|---------------------------|-------------------------|
|                                          | HR: ACEI/ARB     | p-value for interaction | HR: ACEI/ARB              | p-value for interaction |
| Limited adjustment*: PAWP 15             | 1.04 (0.94,1.14) | 0.46                    | 0.99 (0.89,1.12)          | 0.92                    |
| Full adjustment† + Comorbidity§: PAWP 15 | 1.08 (0.98,1.18) | 0.11                    | 1.01 (0.90,1.13)          | 0.92                    |
| AA                                       | HR: AA           | p-value for interaction | HR: AA                    | p-value for interaction |
| Limited adjustment*: PAWP 15             | 1.05 (0.92,1.21) | 0.44                    | 0.92 (0.77,1.10)          | 0.34                    |
| Full adjustment† + Comorbidity§: PAWP 15 | 1.10 (0.96,1.27) | 0.16                    | 0.91 (0.76,1.09)          | 0.30                    |

*Definition of abbreviations: ACEI = Angiotensin converting enzyme inhibitors; ARB = angiotensin receptor blockers; AA= aldosterone antagonists; RAAS = renin angiotensin aldosterone system; HR = hazard ratio*

*\* Limited adjustment accounts for age, sex, race/ethnicity, and body mass index*

*† Full adjustment accounts for the limited model and income, tobacco use, alcohol abuse, and marital status*

*§ Comorbidity included the presence or absence of end-stage renal disease / dialysis, diabetes mellitus, cirrhosis, sleep disordered breathing, chronic obstructive pulmonary disease or asthma, interstitial lung disease, prior myocardial infarction, prior percutaneous coronary intervention, prior coronary artery bypass graft, congestive heart failure, valvular heart disease, congenital heart disease, atrial fibrillation, and/or atrial flutter*

**e-Table 6: Characteristics of patients with precapillary PH stratified by ACEI/ARB use.** Precapillary PH was defined as mPAP  $\geq 25$  mmHg, PAWP  $\leq 15$  mmHg, and PVR  $>3$  Wood units. Values are expressed in percent, with absolute numbers included in parentheses (with the exception of income, hemodynamics and BNP levels, which are expressed as means with standard deviation).

| Variable                                | All subjects<br>(N = 2,875) | ACEI/ARB<br>users<br>(N = 1,422) | ACEI/ARB<br>non-users<br>(N = 1,453) |
|-----------------------------------------|-----------------------------|----------------------------------|--------------------------------------|
| <b>Age</b>                              |                             |                                  |                                      |
| • <45 years                             | 1.4 (39)                    | 0.9 (13)                         | 1.8 (26)                             |
| • 45-54 years                           | 7.8 (223)                   | 6.5 (93)                         | 8.9 (130)                            |
| • 55-64 years                           | 33.7 (970)                  | 33.3 (473)                       | 34.2 (497)                           |
| • 65-74 years                           | 34.8 (1001)                 | 35.7 (507)                       | 34.0 (494)                           |
| • 75-84 years                           | 18.9 (542)                  | 20.3 (288)                       | 17.5 (254)                           |
| • $\geq 85$ years                       | 3.5 (100)                   | 3.4 (48)                         | 3.6 (52)                             |
| <b>Sex (male)</b>                       | 94.6 (2719)                 | 95.4 (1357)                      | 93.7 (1362)                          |
| <b>Race</b>                             |                             |                                  |                                      |
| • White                                 | 72.3 (2080)                 | 70.0 (996)                       | 74.6 (1084)                          |
| • Black                                 | 25.3 (728)                  | 27.6 (393)                       | 23.1 (335)                           |
| • Other                                 | 2.3 (67)                    | 2.3 (33)                         | 2.3 (34)                             |
| <b>Body mass index</b>                  |                             |                                  |                                      |
| • Underweight (<18.5)                   | 1.7 (50)                    | 1.3 (18)                         | 2.2 (32)                             |
| • Normal ( $\geq 18.5 - 25$ )           | 26.9 (773)                  | 23.6 (336)                       | 30.1 (437)                           |
| • Overweight ( $\geq 25 - 30$ )         | 33.5 (964)                  | 34.5 (490)                       | 32.6 (474)                           |
| • Obese ( $\geq 30 - 35$ )              | 21.5 (619)                  | 22.5 (320)                       | 20.6 (299)                           |
| • Severely obese ( $\geq 35$ )          | 16.3 (469)                  | 18.1 (258)                       | 14.5 (211)                           |
| <b>Socioeconomic status</b>             |                             |                                  |                                      |
| • Tobacco use                           | 66.9 (1922)                 | 66.0 (939)                       | 67.7 (983)                           |
| • Alcohol abuse                         | 12.2 (351)                  | 11.6 (165)                       | 12.8 (186)                           |
| • Income (\$/year)                      | 49759.5 (17760)             | 49474.7 (17663)                  | 50038.2 (17856)                      |
| <b>Marital status</b>                   |                             |                                  |                                      |
| • Married                               | 46.0 (1322)                 | 44.4 (631)                       | 47.6 (691)                           |
| • Divorced                              | 31.9 (917)                  | 32.1 (456)                       | 31.7 (461)                           |
| • Single                                | 14.1 (406)                  | 15.0 (214)                       | 13.2 (192)                           |
| • Widowed                               | 8.0 (230)                   | 8.5 (121)                        | 7.5 (109)                            |
| <b>Comorbidities</b>                    |                             |                                  |                                      |
| • Asthma                                | 4.7 (136)                   | 4.1 (59)                         | 5.3 (77)                             |
| • Atrial fibrillation/flutter           | 25.7 (738)                  | 28.2 (401)                       | 23.2 (337)                           |
| • CHD                                   | 0.9 (26)                    | 1.1 (16)                         | 0.7 (10)                             |
| • CHF                                   | 58.2 (1673)                 | 66.5 (945)                       | 50.1 (728)                           |
| • Cirrhosis                             | 9.1 (262)                   | 7.1 (101)                        | 11.1 (161)                           |
| • CKD                                   | 28.3 (814)                  | 28.3 (402)                       | 28.4 (412)                           |
| • COPD                                  | 54.5 (1566)                 | 52.0 (739)                       | 56.9 (827)                           |
| • Diabetes                              | 43.7 (1257)                 | 50.6 (719)                       | 37.0 (538)                           |
| • Hypertension                          | 86.2 (2477)                 | 94.0 (1336)                      | 78.5 (1141)                          |
| • ILD                                   | 1.2 (35)                    | 1.1 (16)                         | 1.3 (19)                             |
| • MI, PCI or CABG                       | 37.6 (1082)                 | 42.1 (598)                       | 33.3 (484)                           |
| • OSA                                   | 12.9 (370)                  | 12.8 (182)                       | 12.9 (188)                           |
| • Valvular heart disease                | 26.7 (767)                  | 28.3 (402)                       | 25.1 (365)                           |
| <b>Medications</b>                      |                             |                                  |                                      |
| • ACE inhibitor                         | 39.2 (1127)                 | 79.3 (1127)                      | 0.0 (0)                              |
| • Aldosterone antagonist                | 12.4 (356)                  | 15.9 (226)                       | 8.9 (130)                            |
| • Alpha agonist                         | 1.4 (39)                    | 1.7 (24)                         | 1.0 (15)                             |
| • Angiotensin receptor antagonist       | 10.9 (313)                  | 22.0 (313)                       | 0.0 (0)                              |
| • Anticoagulant                         | 26.9 (773)                  | 29.5 (420)                       | 24.3 (353)                           |
| • Antiplatelet therapy                  | 16.1 (463)                  | 19.8 (281)                       | 12.5 (182)                           |
| • Beta blocker                          | 59.5 (1710)                 | 74.6 (1061)                      | 44.7 (649)                           |
| • Bronchodilator/inhaled corticosteroid | 52.1 (1497)                 | 52.3 (744)                       | 51.8 (753)                           |
| • Calcium channel blocker               | 22.8 (655)                  | 24.8 (352)                       | 20.9 (303)                           |
| • Digitalis                             | 11.5 (330)                  | 13.6 (194)                       | 9.4 (136)                            |
| • Diuretic                              | 58.9 (1694)                 | 70.4 (1001)                      | 47.7 (693)                           |
| • Glucose-lowering agent                | 29.8 (857)                  | 38.0 (540)                       | 21.8 (317)                           |

Online supplements are not copyedited prior to posting and the author(s) take full responsibility for the accuracy of all data.

|                              |             |             |              |
|------------------------------|-------------|-------------|--------------|
| • H2 blocker                 | 6.6 (191)   | 6.8 (97)    | 6.5 (94)     |
| • Hydrochlorothiazide        | 9.0 (260)   | 11.3 (161)  | 6.8 (99)     |
| • Lipid-lowering agent       | 60.1 (1728) | 73.6 (1046) | 46.9 (682)   |
| • Nitrate                    | 16.3 (469)  | 21.7 (309)  | 11.0 (160)   |
| • Proton pump inhibitor      | 39.0 (1122) | 40.0 (569)  | 38.1 (553)   |
| • Pulmonary vasodilator      | 16.0 (461)  | 11.0 (157)  | 20.9 (304)   |
| • Systemic vasodilator       | 5.7 (164)   | 6.6 (94)    | 4.8 (70)     |
| <b>Hemodynamics</b>          |             |             |              |
| • RAP (mmHg)                 | 8.1 (4.2)   | 8.0 (4.0)   | 8.2 (4.5)    |
| • mPAP (mmHg)                | 34.9 (8.8)  | 33.8 (8.1)  | 36.0 (9.4)   |
| • PAWP (mmHg)                | 11.1 (3.1)  | 11.6 (2.9)  | 10.7 (3.3)   |
| • CI (L/min/m <sup>2</sup> ) | 2.3 (0.5)   | 2.3 (0.5)   | 2.3 (0.6)    |
| • PVR (Wood units)           | 5.4 (2.8)   | 5.1 (2.4)   | 5.8 (3.1)    |
| • MAP (mmHg)                 | 93.4 (9.8)  | 94.3 (10.3) | 92.4 (9.3)   |
| <b>Disease severity</b>      |             |             |              |
| • Inpatient status           | 38.7 (1114) | 43.7 (621)  | 33.9 (493)   |
| • BNP (pg/ml)                | 926 (2082)  | 793 (1325)  | 1,081 (2701) |

*Definition of abbreviations: BNP = B-type natriuretic peptide, CABG = coronary artery bypass grafting, CHD = congenital heart disease, CHF = congestive heart failure, CKD = chronic kidney disease, COPD = chronic obstructive pulmonary disease, ILD = interstitial lung disease, MI = myocardial infarction, OSA = obstructive sleep apnea, PCI = percutaneous coronary intervention; RAP = right atrial pressure, mPAP = mean pulmonary arterial pressure, PAWP = pulmonary artery wedge pressure, CI = cardiac index, PVR = pulmonary vascular resistance, MAP = mean arterial pressure.*



**e-Table 7: Characteristics of patients with precapillary PH stratified by AA use.** Precapillary PH was defined as mPAP  $\geq$ 25 mmHg, PAWP  $\leq$ 15 mmHg, and PVR  $>$ 3 Wood units. Values are expressed in percent, with absolute numbers included in parentheses (with the exception of income, hemodynamics and BNP levels, which are expressed as means with standard deviation).

| Variable                                | All subjects<br>(N = 529) | AA<br>users<br>(N = 110) | AA<br>non-users<br>(N = 419) |
|-----------------------------------------|---------------------------|--------------------------|------------------------------|
| <b>Age</b>                              |                           |                          |                              |
| • <45 years                             | 1.1 (6)                   | 1.8 (2)                  | 1.0 (4)                      |
| • 45-54 years                           | 7.0 (37)                  | 8.2 (9)                  | 6.7 (28)                     |
| • 55-64 years                           | 32.1 (170)                | 43.6 (48)                | 29.1 (122)                   |
| • 65-74 years                           | 35.3 (187)                | 30.9 (34)                | 36.5 (153)                   |
| • 75-84 years                           | 18.9 (100)                | 11.8 (13)                | 20.8 (87)                    |
| • $\geq$ 85 years                       | 5.5 (29)                  | 3.6 (4)                  | 6.0 (25)                     |
| <b>Sex (male)</b>                       | 95.8 (507)                | 96.4 (106)               | 95.7 (401)                   |
| <b>Race</b>                             |                           |                          |                              |
| • White                                 | 69.4 (367)                | 62.7 (69)                | 71.1 (298)                   |
| • Black                                 | 27.2 (144)                | 34.5 (38)                | 25.3 (106)                   |
| • Other                                 | 3.4 (18)                  | 2.7 (3)                  | 3.6 (15)                     |
| <b>Body mass index</b>                  |                           |                          |                              |
| • Underweight (<18.5)                   | 1.9 (10)                  | 0.0 (0)                  | 2.4 (10)                     |
| • Normal ( $\geq$ 18.5 - 25)            | 30.4 (161)                | 27.3 (30)                | 31.3 (131)                   |
| • Overweight ( $\geq$ 25 - 30)          | 33.3 (176)                | 35.5 (39)                | 32.7 (137)                   |
| • Obese ( $\geq$ 30 - 35)               | 16.8 (89)                 | 14.5 (16)                | 17.4 (73)                    |
| • Severely obese ( $\geq$ 35)           | 17.6 (93)                 | 22.7 (25)                | 16.2 (68)                    |
| <b>Socioeconomic status</b>             |                           |                          |                              |
| • Tobacco use                           | 62.9 (333)                | 66.4 (73)                | 62.1 (260)                   |
| • Alcohol abuse                         | 14.2 (75)                 | 14.5 (16)                | 14.1 (59)                    |
| • Income (\$/year)                      | 49019.7 (17145)           | 49251.5 (18914)          | 48958.9 (16673)              |
| <b>Marital status</b>                   |                           |                          |                              |
| • Married                               | 42.5 (225)                | 42.7 (47)                | 42.5 (178)                   |
| • Divorced                              | 32.3 (171)                | 30.9 (34)                | 32.7 (137)                   |
| • Single                                | 15.5 (82)                 | 17.3 (19)                | 15.0 (63)                    |
| • Widowed                               | 9.6 (51)                  | 9.1 (10)                 | 9.8 (41)                     |
| <b>Comorbidities</b>                    |                           |                          |                              |
| • Asthma                                | 3.8 (20)                  | 3.6 (4)                  | 3.8 (16)                     |
| • Atrial fibrillation/flutter           | 31.8 (168)                | 43.6 (48)                | 28.6 (120)                   |
| • CHD                                   | 0.6 (3)                   | 0.0 (0)                  | 0.7 (3)                      |
| • CHF                                   | 74.7 (395)                | 92.7 (102)               | 69.9 (293)                   |
| • Cirrhosis                             | 8.9 (47)                  | 12.7 (14)                | 7.9 (33)                     |
| • CKD                                   | 34.8 (184)                | 36.4 (40)                | 34.4 (144)                   |
| • COPD                                  | 56.9 (301)                | 45.5 (50)                | 59.9 (251)                   |
| • Diabetes                              | 47.6 (252)                | 51.8 (57)                | 46.5 (195)                   |
| • Hypertension                          | 91.3 (483)                | 93.6 (103)               | 90.7 (380)                   |
| • ILD                                   | 0.9 (5)                   | 0.0 (0)                  | 1.2 (5)                      |
| • MI, PCI or CABG                       | 42.5 (225)                | 47.3 (52)                | 41.3 (173)                   |
| • OSA                                   | 16.6 (88)                 | 17.3 (19)                | 16.5 (69)                    |
| • Valvular heart disease                | 32.3 (171)                | 30.9 (34)                | 32.7 (137)                   |
| <b>Medications</b>                      |                           |                          |                              |
| • ACE inhibitor                         | 43.5 (230)                | 58.2 (64)                | 39.6 (166)                   |
| • Aldosterone antagonist                | 20.8 (110)                | 100.0 (110)              | 0.0 (0)                      |
| • Alpha agonist                         | 0.8 (4)                   | 0.0 (0)                  | 1.0 (4)                      |
| • Angiotensin receptor antagonist       | 11.2 (59)                 | 11.8 (13)                | 11.0 (46)                    |
| • Anticoagulant                         | 31.4 (166)                | 39.1 (43)                | 29.4 (123)                   |
| • Antiplatelet therapy                  | 19.3 (102)                | 16.4 (18)                | 20.0 (84)                    |
| • Beta blocker                          | 69.0 (365)                | 79.1 (87)                | 66.3 (278)                   |
| • Bronchodilator/inhaled corticosteroid | 55.6 (294)                | 47.3 (52)                | 57.8 (242)                   |
| • Calcium channel blocker               | 18.0 (95)                 | 11.8 (13)                | 19.6 (82)                    |
| • Digitalis                             | 21.6 (114)                | 41.8 (46)                | 16.2 (68)                    |
| • Diuretic                              | 76.2 (403)                | 92.7 (102)               | 71.8 (301)                   |
| • Glucose-lowering agent                | 32.1 (170)                | 42.7 (47)                | 29.4 (123)                   |

Online supplements are not copyedited prior to posting and the author(s) take full responsibility for the accuracy of all data.

|                              |             |              |            |
|------------------------------|-------------|--------------|------------|
| • H2 blocker                 | 6.8 (36)    | 9.1 (10)     | 6.2 (26)   |
| • Hydrochlorothiazide        | 5.1 (27)    | 2.7 (3)      | 5.7 (24)   |
| • Lipid-lowering agent       | 63.5 (336)  | 71.8 (79)    | 61.3 (257) |
| • Nitrate                    | 20.8 (110)  | 29.1 (32)    | 18.6 (78)  |
| • Proton pump inhibitor      | 47.6 (252)  | 49.1 (54)    | 47.3 (198) |
| • Pulmonary vasodilator      | 20.4 (108)  | 18.2 (20)    | 21.0 (88)  |
| • Systemic vasodilator       | 8.9 (47)    | 10.9 (12)    | 8.4 (35)   |
| <b>Hemodynamics</b>          |             |              |            |
| • RAP (mmHg)                 | 8.5 (4.4)   | 8.8 (4.8)    | 8.5 (4.3)  |
| • mPAP (mmHg)                | 34.6 (8.7)  | 32.3 (6.9)   | 35.3 (9.1) |
| • PAWP (mmHg)                | 11.6 (2.9)  | 12.2 (2.7)   | 11.4 (2.9) |
| • CI (L/min/m <sup>2</sup> ) | 2.2 (0.5)   | 2.1 (0.5)    | 2.2 (0.5)  |
| • PVR (Wood units)           | 5.5 (2.8)   | 5.0 (2.0)    | 5.6 (3.0)  |
| • MAP (mmHg)                 | 91.8 (10.1) | 91.6 (11.6)  | 91.9 (9.7) |
| <b>Disease severity</b>      |             |              |            |
| • Inpatient status           | 59.5 (315)  | 70.0 (77)    | 56.8 (238) |
| • BNP (pg/ml)                | 926 (2082)  | 1,102 (2493) | 880 (1960) |

*Definition of abbreviations: BNP = B-type natriuretic peptide, CABG = coronary artery bypass grafting, CHD = congenital heart disease, CHF = congestive heart failure, CKD = chronic kidney disease, COPD = chronic obstructive pulmonary disease, ILD = interstitial lung disease, MI = myocardial infarction, OSA = obstructive sleep apnea, PCI = percutaneous coronary intervention; RAP = right atrial pressure, mPAP = mean pulmonary arterial pressure, PAWP = pulmonary artery wedge pressure, CI = cardiac index, PVR = pulmonary vascular resistance, MAP = mean arterial pressure.*
